# Supplementary material for: Estimating HIV pre-exposure prophylaxis (PrEP) use and analysis of HIV PrEP needs among men who have sex with men in Germany
Source: Research Square preprint supplement (doi:10.21203/rs.3.rs-156075/v1), 2021-02-17
Supplement: Supplementary file 1 [file 60573cffcabb1794b2446f4f.docx]

Estimating HIV pre-exposure prophylaxis (PrEP) use and analysis of HIV PrEP needs among men who have sex with men in Germany

Ulrich Marcus, Daniel Schmidt, Susanne B. Schink, Uwe Koppe

Robert Koch-Institute, Department for Infectious Diseases Epidemiology, Berlin, Germany

Corresponding author:

Ulrich Marcus, Email: MarcusU@rki.de

**Supplemental tables and figures**

**Tab.S1: Number of PrEP pills used by PrApp survey respondents taking PrEP**

| **PrApp survey round** | **Average use per month*** | **daily use** | **intermittent use** | **on demand use** | **Total** |
| --- | --- | --- | --- | --- | --- |
| **Round 1** | 26+ days | 1,212 | 57 | 12 |  |
|  |  | 97.19 | 23.08 | 4.82 |  |
|  | 12-25 days | 31 | 99 | 52 |  |
|  |  | 2.49 | 40.08 | 20.88 |  |
|  | 1-11 days | 4 | 91 | 185 |  |
|  |  | 0.32 | 36.84 | 74.3 |  |
|  | Total | 1,247 | 247 | 249 | 1,743 |
|  |  | 100 | 100 | 100 |  |
|  |  | 71.54 | 14.17 | 14.29 |  |
|  |  |  |  |  |  |
| **Round 2** | 26+ days | 1,863 | 53 | 12 |  |
|  |  | 96.48 | 13.38 | 2.71 |  |
|  | 12-25 days | 57 | 127 | 93 |  |
|  |  | 2.95 | 32.07 | 20.99 |  |
|  | 1-11days | 11 | 216 | 338 |  |
|  |  | 0.57 | 54.55 | 76.3 |  |
|  | Total | 1,931 | 396 | 443 | 2,770 |
|  |  | 100 | 100 | 100 |  |
|  |  | 69.71 | 14.30 | 15.99 |  |
|  |  |  |  |  |  |
|  | **Average use per week**** | **daily use** | **intermittent use** | **on demand use** |  |
| **Round 3** | 4+ days | 641 | 38 | 45 |  |
|  |  | 99.69 | 66.67 | 44.55 |  |
|  | 0-3days | 2 | 19 | 56 |  |
|  |  | 0.31 | 33.33 | 55.45 |  |
|  | Total | 643 | 57 | 101 | 801 |
|  |  | 100 | 100 | 100 |  |
|  |  | 80.27 | 7.12 | 12.61 |  |
|  |  |  |  |  |  |
| * On average, on how many days per month do you take your PrEP pills? | | | |  |  |
| *If you don't take PrEP continuously, please indicate your average PrEP use during a month when you take PrEP* | | | | |  |
| ** On average, on how many days per week do you take your PrEP pills? | | | |  |  |
| *If you don't take PrEP continuously, please indicate your average PrEP use during a week when you take PrEP* | | | | |  |

**Tab.S2: Proportion of PrApp respondents announcing PrEP use in online profile**

| **Type of PrEP use** | **PlanetRomeo** |  |  | **Grindr** |  |  |
| --- | --- | --- | --- | --- | --- | --- |
|  | PrApp round1 (n=377) | PrApp round2 (n=478) | PrApp round3 (n=151) | PrApp round1 (n=954) | PrApp round2 (n=1,605 | PrApp round3 (n=391) |
| daily | 46.0 | 62.1 | 72.0 | 55.1 | 65.0 | 67.5 |
| intermittent | 31.8 | 40.0 | 83.3 | 41.5 | 48.9 | 54.8 |
| on-demand | 17.5 | 45.9 | 33.3 | 32.4 | 46.6 | 65.1 |
| Total | 38.7 | 55.9 | 66.9 | 50.0 | 59.8 | 66.2 |

**Table S3: Proportional regional distribution (by federal state) of all EMIS-2017 participants, EMIS-participants using PrEP, PrApp-Survey participants using PrEP, statutory health insurance PrEP prescriptions, PlanetRomeo profiles in Germany, and PlanetRomeo profiles indicating PrEP use.**

|  | **EMIS-2017 respondents with no HIV diagnosis**  **N** | **Proportion using PrEP by time of data collection (11/2017)**  **%** | **GayRomeo profiles by 06/2020**  **N** | **Proportion of GayRomeo profiles indicating PrEP use by 06/2020**  **%** | **PrEP intention distribution**  **%** | **Distribution of PrEP-users in PrApp survey wave 2 (05/2019) (n=2,252)**  **%** | **Distribution of PrEP-users in PrApp survey wave 3 (03/2020) (n=790)**  **%** | **Distribution of statutory health insurance PrEP prescriptions, last quarter 2019**  **%** | **Distribution of statutory health insurance PrEP prescriptions, first two quarters 2020**  **%** | **Distribution of GayRomeo PrEP profiles by 06/2020**  **%** | **Estimate for gay population***  **N** |
| --- | --- | --- | --- | --- | --- | --- | --- | --- | --- | --- | --- |
| Baden-Wurttemberg | 2,240 | 1.38 | 69,682 | 1.42 | 11.49 | 7.10 | 7.34 | 5.60 | 5.05 | 6.35 | 44,651 |
| Bavaria | 2,672 | 2.02 | 91,857 | 2.34 | 13.70 | 13.77 | 15.95 | 12.20 | 12.10 | 13.76 | 54,061 |
| Berlin | 2,590 | 6.25 | 77,590 | 5.93 | 16.00 | 27.49 | 22.41 | 39.40 | 38.90 | 29.42 | 59,394 |
| Brandenburg | 420 | 1.19 | 10,707 | 1.45 | 2.19 | 0.93 | 1.27 | 0.00 | 0.05 | 0.99 | 8,395 |
| Bremen | 194 | 3.09 | 8,653 | 1.71 | 1.01 | 0.49 | 0.63 | 0.50 | 0.70 | 0.95 | 3,930 |
| Hamburg | 820 | 2.80 | 28,848 | 3.31 | 4.14 | 6.31 | 5.44 | 6.90 | 6.90 | 6.10 | 17,713 |
| Hesse | 1,516 | 2.44 | 53,993 | 2.22 | 7.26 | 8.48 | 9.24 | 8.00 | 8.25 | 7.68 | 31,422 |
| Mecklenburg-West.Pomerania | 318 | 0.31 | 9,785 | 0.97 | 1.41 | 0.53 | 1.14 | 0.20 | 0.15 | 0.61 | 6,329 |
| Lower Saxony | 1,422 | 0.98 | 47,838 | 1.42 | 6.93 | 3.60 | 5.70 | 3.10 | 3.10 | 4.34 | 28,175 |
| North Rhine- Westphalia | 3,842 | 1.80 | 141,360 | 2.27 | 20.14 | 21.54 | 20.76 | 18.80 | 19.35 | 20.50 | 79,376 |
| Rhineland-Palatinate | 658 | 1.06 | 27,611 | 1.66 | 3.45 | 2.66 | 3.80 | 0.80 | 0.85 | 2.92 | 13,156 |
| Saarland | 222 | 1.35 | 7,645 | 1.83 | 1.22 | 0.84 | 0.63 | 0.80 | 0.80 | 0.90 | 4,520 |
| Saxony | 1,019 | 0.88 | 26,628 | 1.62 | 4.86 | 4.04 | 3.42 | 2.60 | 2.60 | 2.76 | 20,499 |
| Saxony-Anhalt | 381 | 0.52 | 11,974 | 1.03 | 1.72 | 0.71 | 0.63 | 0.50 | 0.55 | 0.79 | 7,454 |
| Schleswig-Holstein | 681 | 1.62 | 16,334 | 1.29 | 2.91 | 0.84 | 1.27 | 0.20 | 0.30 | 1.35 | 13,395 |
| Thuringia | 364 | 0.27 | 12,818 | 0.71 | 1.57 | 0.67 | 0.38 | 0.30 | 0.35 | 0.58 | 6,956 |
| Total | 19,359 | 2.25 | 643,323 | 2.43 | 100.00 | 100.00 | 100.01 | 99.90 | 100.00 | 100.00 | 399,426 |

*(1,5% of adult male population, EMIS distribution, non-gay-identified MSM excluded)

**Table S4: PrEP-need groups in EMIS-2017**

|  | **intention, no reported risk*** | **intention and risk** | **no intention, but risk** | **no intention, no reported risk** |
| --- | --- | --- | --- | --- |
| Baden-Wurttemberg | 257 | 232 | 200 | 1,551 |
| Bavaria | 319 | 264 | 220 | 1,869 |
| Berlin | 296 | 385 | 283 | 1,626 |
| Brandenburg | 50 | 43 | 29 | 298 |
| Bremen | 21 | 22 | 24 | 127 |
| Hamburg | 91 | 85 | 91 | 553 |
| Hesse | 166 | 143 | 132 | 1,075 |
| Mecklenburg-Western Pomerania | 30 | 30 | 32 | 226 |
| Lower Saxony | 163 | 132 | 113 | 1,014 |
| North Rhine-Westphalia | 448 | 409 | 376 | 2,609 |
| Rhineland-Palatinate | 72 | 75 | 50 | 461 |
| Saarland | 24 | 28 | 27 | 143 |
| Saxony | 108 | 99 | 89 | 723 |
| Saxony-Anhalt | 37 | 36 | 34 | 274 |
| Schleswig-Holstein | 61 | 63 | 73 | 484 |
| Thuringia | 36 | 31 | 40 | 257 |
| missing | 166 | 135 | 99 | 886 |
| BL distributed N | 2,179 | 2,077 | 1,813 | 13,290 |
| Total | 2,345 | 2,212 | 1,912 | 14,176 |

**Table S5: Univariable analysis of association of PrEP use intentions with demographic and behavioural factors and sexual unhappiness**

|  | OR | 95% CI | | p | aOR |
| --- | --- | --- | --- | --- | --- |
| Demographics |  |  |  |  |  |
| *Settlement size* |  |  |  |  |  |
| A very big city or town (a million or more) | 0.98 | 0.89 | 1.07 | 0.659 |  |
| A big city or town (500,000-999,999) | 0.99 | 0.89 | 1.10 | 0.867 |  |
| A medium-sized city or town (100,000-499,999) | 0.98 | 0.89 | 1.08 | 0.701 |  |
| A small city or town (10,000-99,999) | 0.98 | 0.89 | 1.08 | 0.675 |  |
| Village or countryside (below 10,000) | ref. |  |  |  |  |
| *Federal state* |  |  |  |  |  |
| Baden-Wurttemberg | 0.91 | 0.81 | 1.03 | 0.148 |  |
| Bavaria | 0.97 | 0.87 | 1.09 | 0.658 |  |
| Berlin | ref. |  |  |  |  |
| Brandenburg | 1.12 | 0.90 | 1.39 | 0.309 |  |
| Bremen | 0.91 | 0.66 | 1.25 | 0.543 |  |
| Hamburg | **0.81** | 0.68 | 0.96 | 0.017 |  |
| Hesse | 0.89 | 0.77 | 1.02 | 0.084 |  |
| Mecklenburg-Western Pomerania | 1.00 | 0.78 | 1.28 | 0.993 |  |
| Lower Saxony | 0.91 | 0.79 | 1.05 | 0.203 |  |
| North Rhine-Westphalia | 0.95 | 0.86 | 1.06 | 0.364 |  |
| Rhineland-Palatinate | 0.97 | 0.81 | 1.16 | 0.721 |  |
| Saarland | 1.03 | 0.77 | 1.38 | 0.823 |  |
| Saxony | 0.92 | 0.78 | 1.07 | 0.269 |  |
| Saxony-Anhalt | 1.08 | 0.86 | 1.35 | 0.528 |  |
| Schleswig-Holstein | 0.87 | 0.72 | 1.04 | 0.127 |  |
| Thuringia | 0.99 | 0.79 | 1.26 | 0.956 |  |
| *Level of education* |  |  |  |  |  |
| Low (less than secondary) | ref. |  |  |  |  |
| Mid (at least upper secondary; 2-5 years post 16) | 1.08 | 0.89 | 1.31 | 0.462 |  |
| High (first stage of tertiary or more; 6+ years pos..) | 0.88 | 0.72 | 1.06 | 0.182 |  |
| *Sex for money* |  |  |  |  |  |
| not sold sex or less than 3 times | ref. |  |  |  |  |
| Sold sex at least 3 times last 12months | **1.94** | 1.58 | 2.39 | <0.001 | 1.09 |
| *Outness* |  |  |  |  |  |
| All or almost all | 0.83 | 0.75 | 0.92 | <0.001 |  |
| More than half | 0.89 | 0.79 | 1.00 | 0.050 |  |
| Less than half | 0.95 | 0.83 | 1.09 | 0.455 |  |
| Few | 1.05 | 0.93 | 1.18 | 0.451 |  |
| None | ref. |  |  |  |  |
| Behaviours |  |  |  |  |  |
| *Multipartner sex during last non-steady partner sex* | | |  |  |  |
| It was me and one non-steady partner | **ref.** |  |  |  |  |
| It was me, my partner and a non-steady partner | **0.82** | 0.72 | 0.95 | 0.006 |  |
| It was me and 2 non-steady partners (a threesome) | **1.40** | 1.23 | 1.60 | <0.001 | **1.24** |
| It was me and three or more other people | **1.63** | 1.41 | 1.89 | <0.001 | 1.17 |
| Morbidities |  |  |  |  |  |
| *Sexual unhappiness* |  |  |  |  |  |
| 1 | ref. |  |  |  |  |
| 2 | **0.81** | 0.68 | 0.97 | 0.020 |  |
| 3 | 1.02 | 0.88 | 1.18 | 0.835 |  |
| 4 | 0.99 | 0.85 | 1.15 | 0.868 |  |
| 5 | 1.10 | 0.94 | 1.29 | 0.241 |  |
| 6 | 1.00 | 0.86 | 1.17 | 0.983 |  |
| 7 | 1.01 | 0.86 | 1.20 | 0.872 |  |
| 8 | 0.97 | 0.82 | 1.15 | 0.708 |  |
| 9 | 0.87 | 0.70 | 1.07 | 0.184 |  |
| 10 | 1.00 | 0.81 | 1.23 | 0.975 |  |

**Fig.S1a-d: Comparison regarding CAI partner numbers, HIV test recency, disagreement with the statement “The sex I have is always as safe as I want”, and PrEP awareness between the four groups 1) intention to use PrEP, low sexual risk*; 2) intention to use PrEP, moderate/high sexual risk; 3) no intention to use PrEP, moderate/high sexual risk; 4) no intention to use PrEP, low sexual risk.**

* respondents in the group „intention, no risk” who indicated less than 2 non-steady partners in the recent 12 months were *not* excluded for these figures.
